# Supplementary material
Source: PubMed Central journal article supplement (PMC1895476)
Supplement: blood_blood-2006-07-032847_1.pdf [file blood_blood-2006-07-032847_1.pdf]

## Realtime PCR ChIP primers

AHSP promoter

Forward 5'-TGCCTGCGTCTCGCTTAGT-3'

Reverse 5'-GCTGAGCCCCGCCTCATC-3'

$\alpha$ -globin promoter

Forward 5'-TGACCAAGGTAGGAGGATACTAACTT-3'

Reverse 5'-TTGCCCGGACACACTTCTTAC-3'

Band 3 promoter

Forward 5'-CTGAGCAGTCAAGCCTTAGTTCAC-3'

Reverse 5'-CCTGTCCAGTCCCTAAGGTCTTT-3'

$\beta$ -major promoter

Forward 5'-CAGGGAGAAATATGCTTGTCATCA-3'

Reverse 5'-GTGAGCAGATTGGCCCTTACC-3'

FOG locus CRM 1

Forward 5'-TGCAAGTCCCATCCTGATAAGA-3'

Reverse 5'-GCACGCCAGATAAGATCACAATT-3'

FOG locus upstream

Forward 5'-GGCAGATGTTCACTGTGGCA-3'

Reverse 5'-GGGAGGAGCCAGAGGTCAG-3'

HS3

Forward 5'-CTAGGGACTGAGAGAGGCTGCTT-3'

Reverse 5'-ATGGGACCTCTGATAGACACATCTT-3'

EKLF promoter

Forward 5'-TCTGCTCAAGGAGGAACAGAGCTA

Reverse 5'-GGCTCCCTTTCAGGCATTATCAGA-3'

c-kit intron 1

Forward 5'-GGCTGGAAACCACTGCCTTA-3'

Reverse 5'-AGCCTTGCCTGTGCTTAAAGC-3'

GATA-2 (-3.9)

Forward 5'-GAGATGAGCTAATCCCGCTGTA-3'

Reverse 5'-AAGGCTGTATTTTCCAGGCC-3'

## Gel Shift Probe Sequences

$\alpha$ -globin promoter F

5'-GATCTCCGGCAACTGATAAGGATTCCCTG-3'

GATA-2 (-2.8) F

5'-GGAGCCGGGCAGATAACGATTGGCTATTC-3'

HS3 F

5'-GAAGATGTGTCTATCAGAGGTCCCATATG-3'

GATA-2 (-3.9) F

5'-GACTCCGGGGAGATAGGAAAATGGCCGCG-3'
