# Supplementary material
Source: PubMed Central journal article supplement (PMC1895476)

A

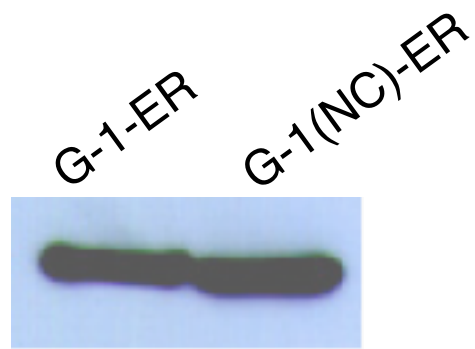

B

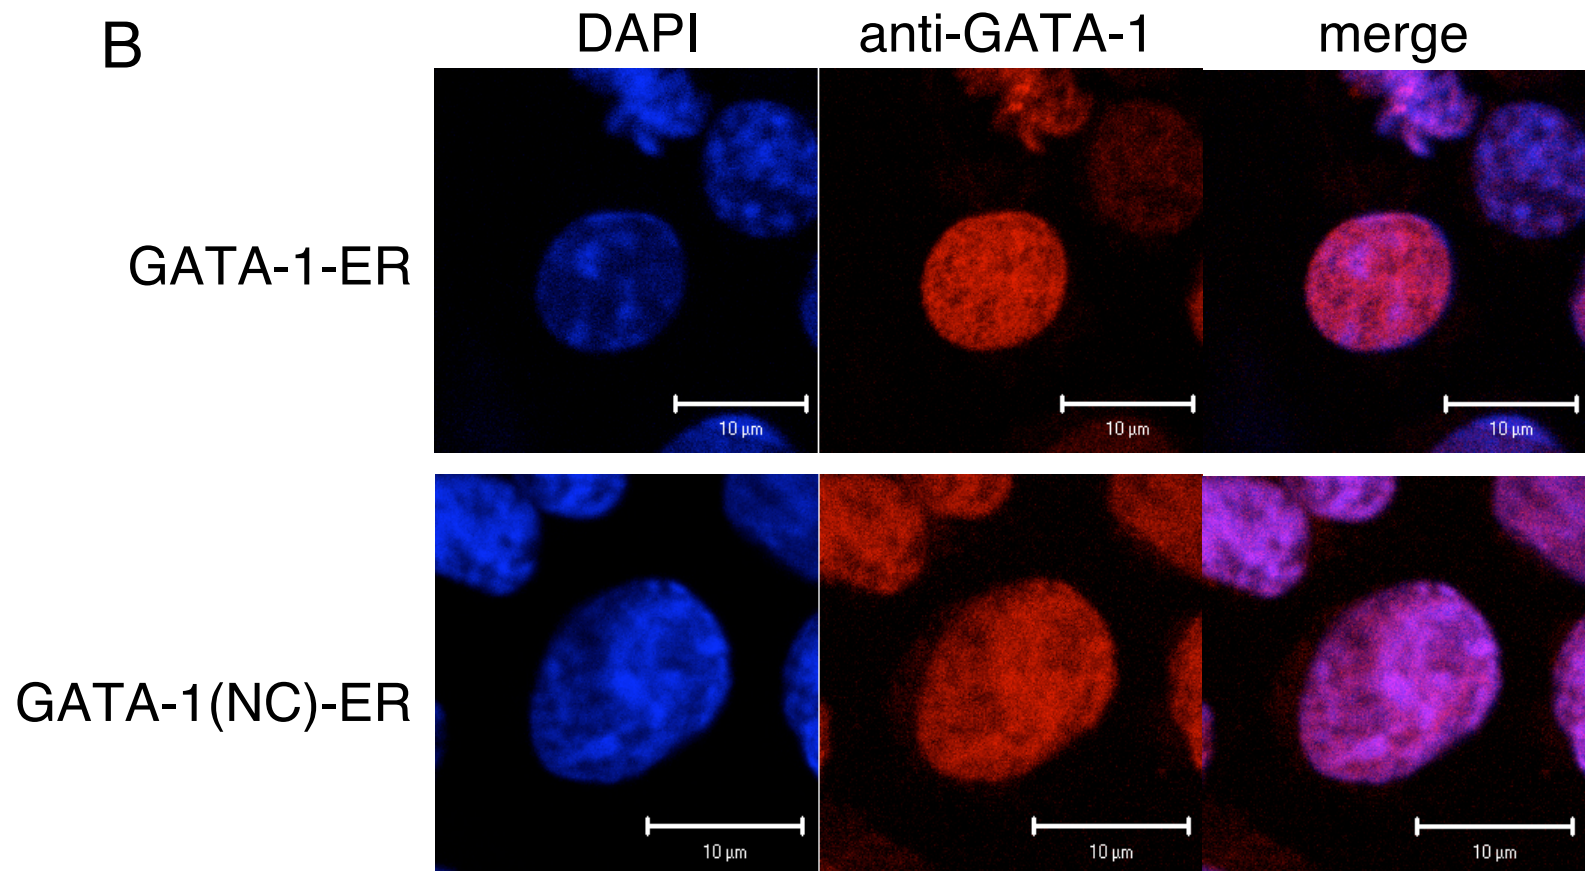

Supplement: blood_blood-2006-07-032847_2.pdf [file blood_blood-2006-07-032847_2.pdf]

A

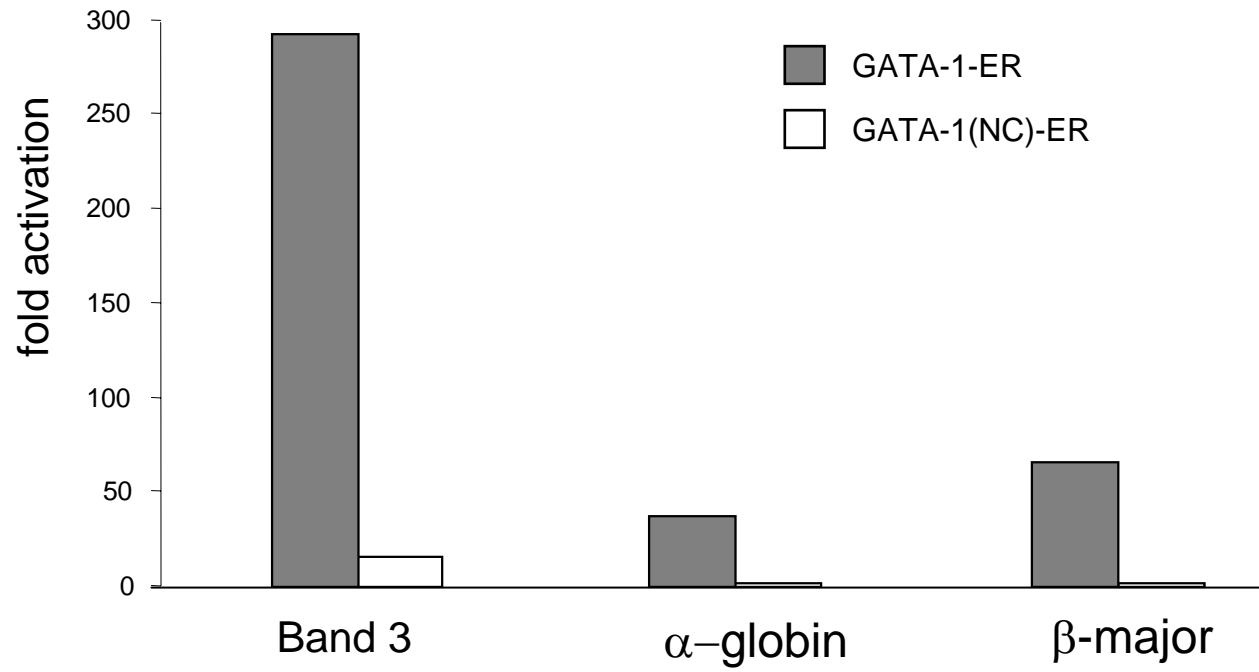

B

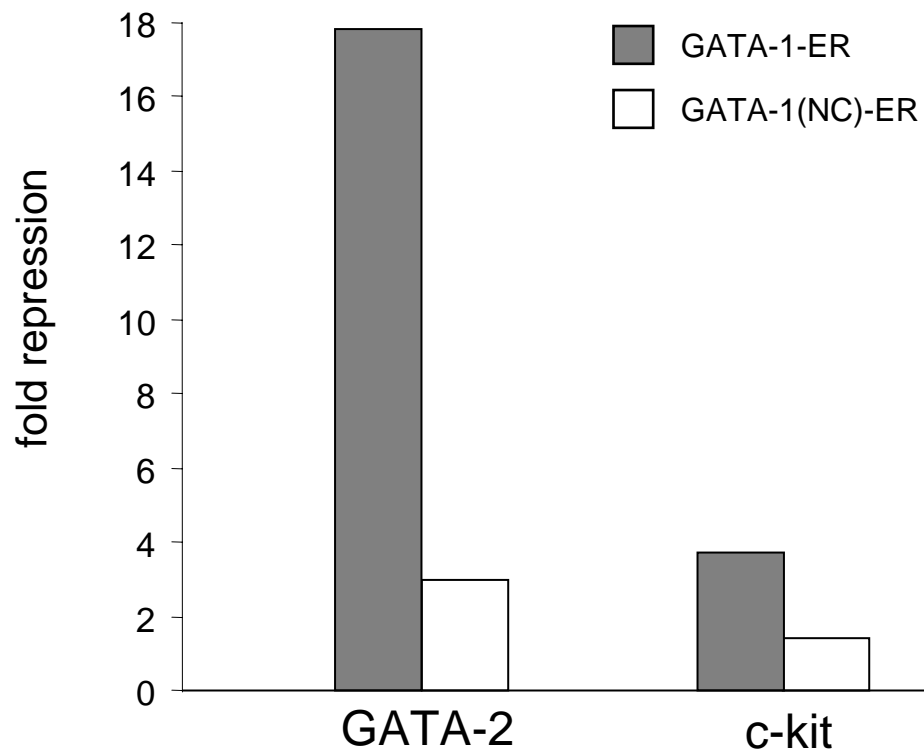

Supplement: blood_blood-2006-07-032847_3.pdf [file blood_blood-2006-07-032847_3.pdf]

### HS3 (TGATAG)

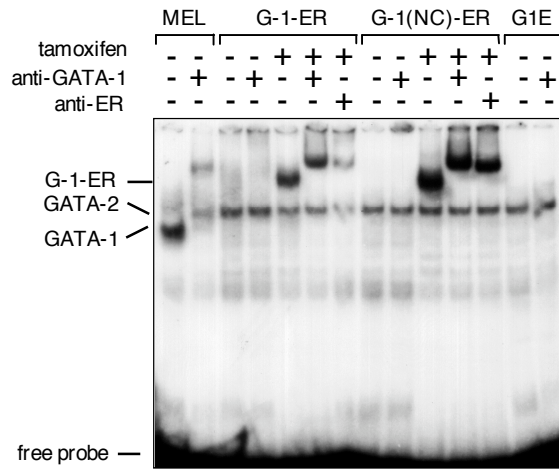

### G-2 -2.8 (AGATAA)

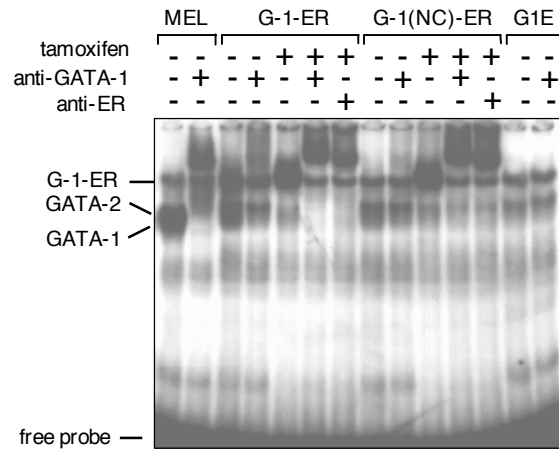

### G-2 -3.9 (AGATAG)

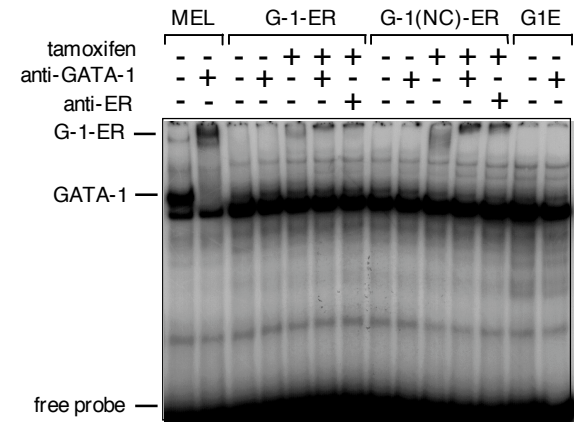

Supplement: blood_blood-2006-07-032847_4.pdf [file blood_blood-2006-07-032847_4.pdf]

A

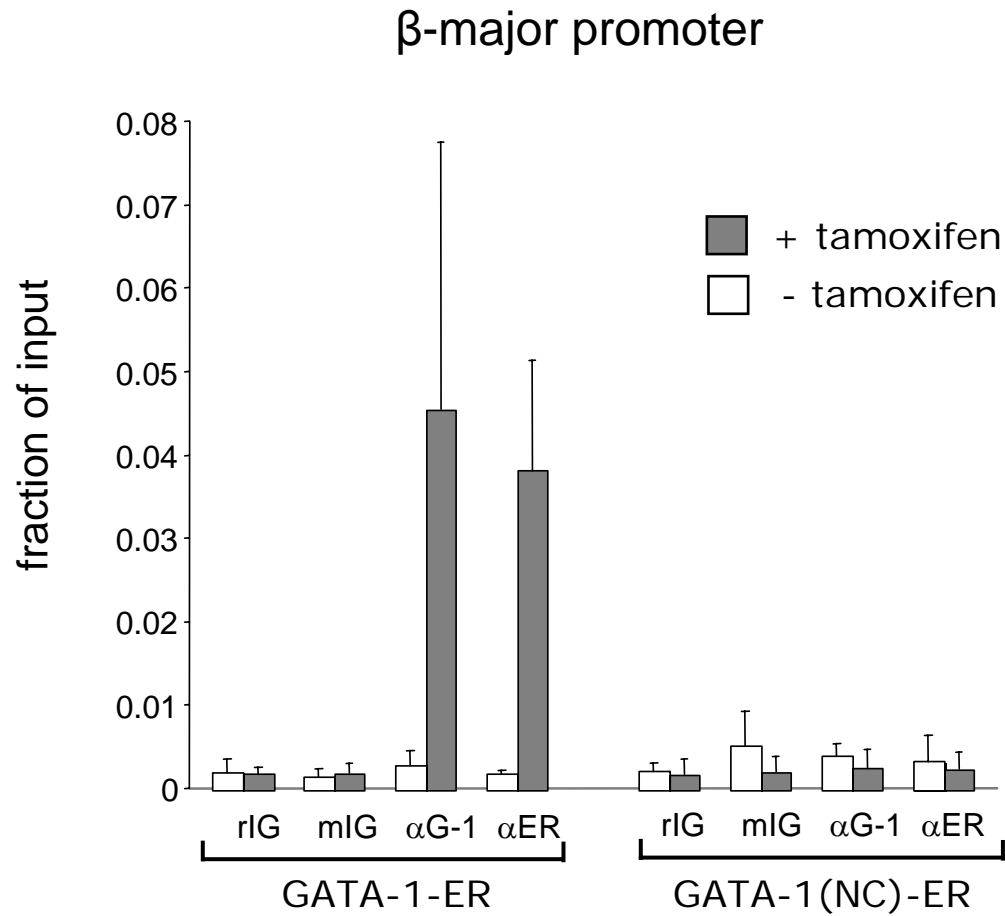

B

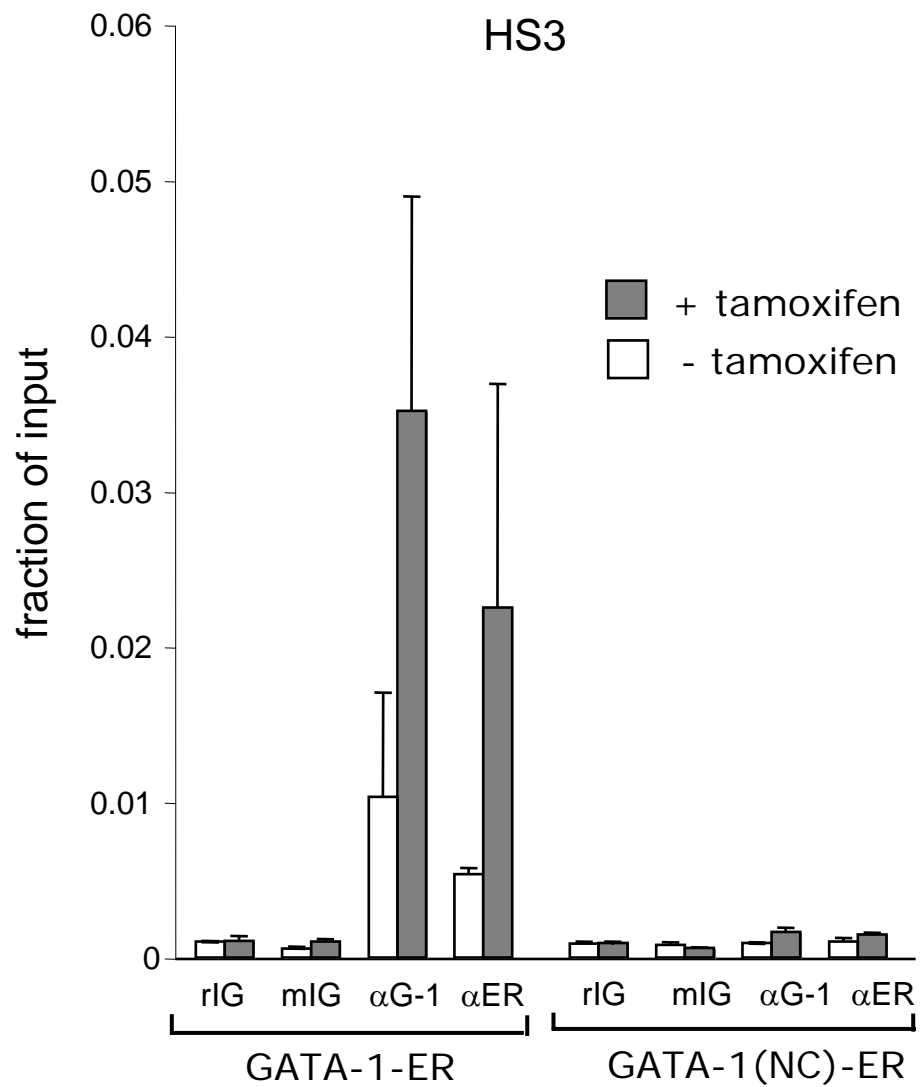

C

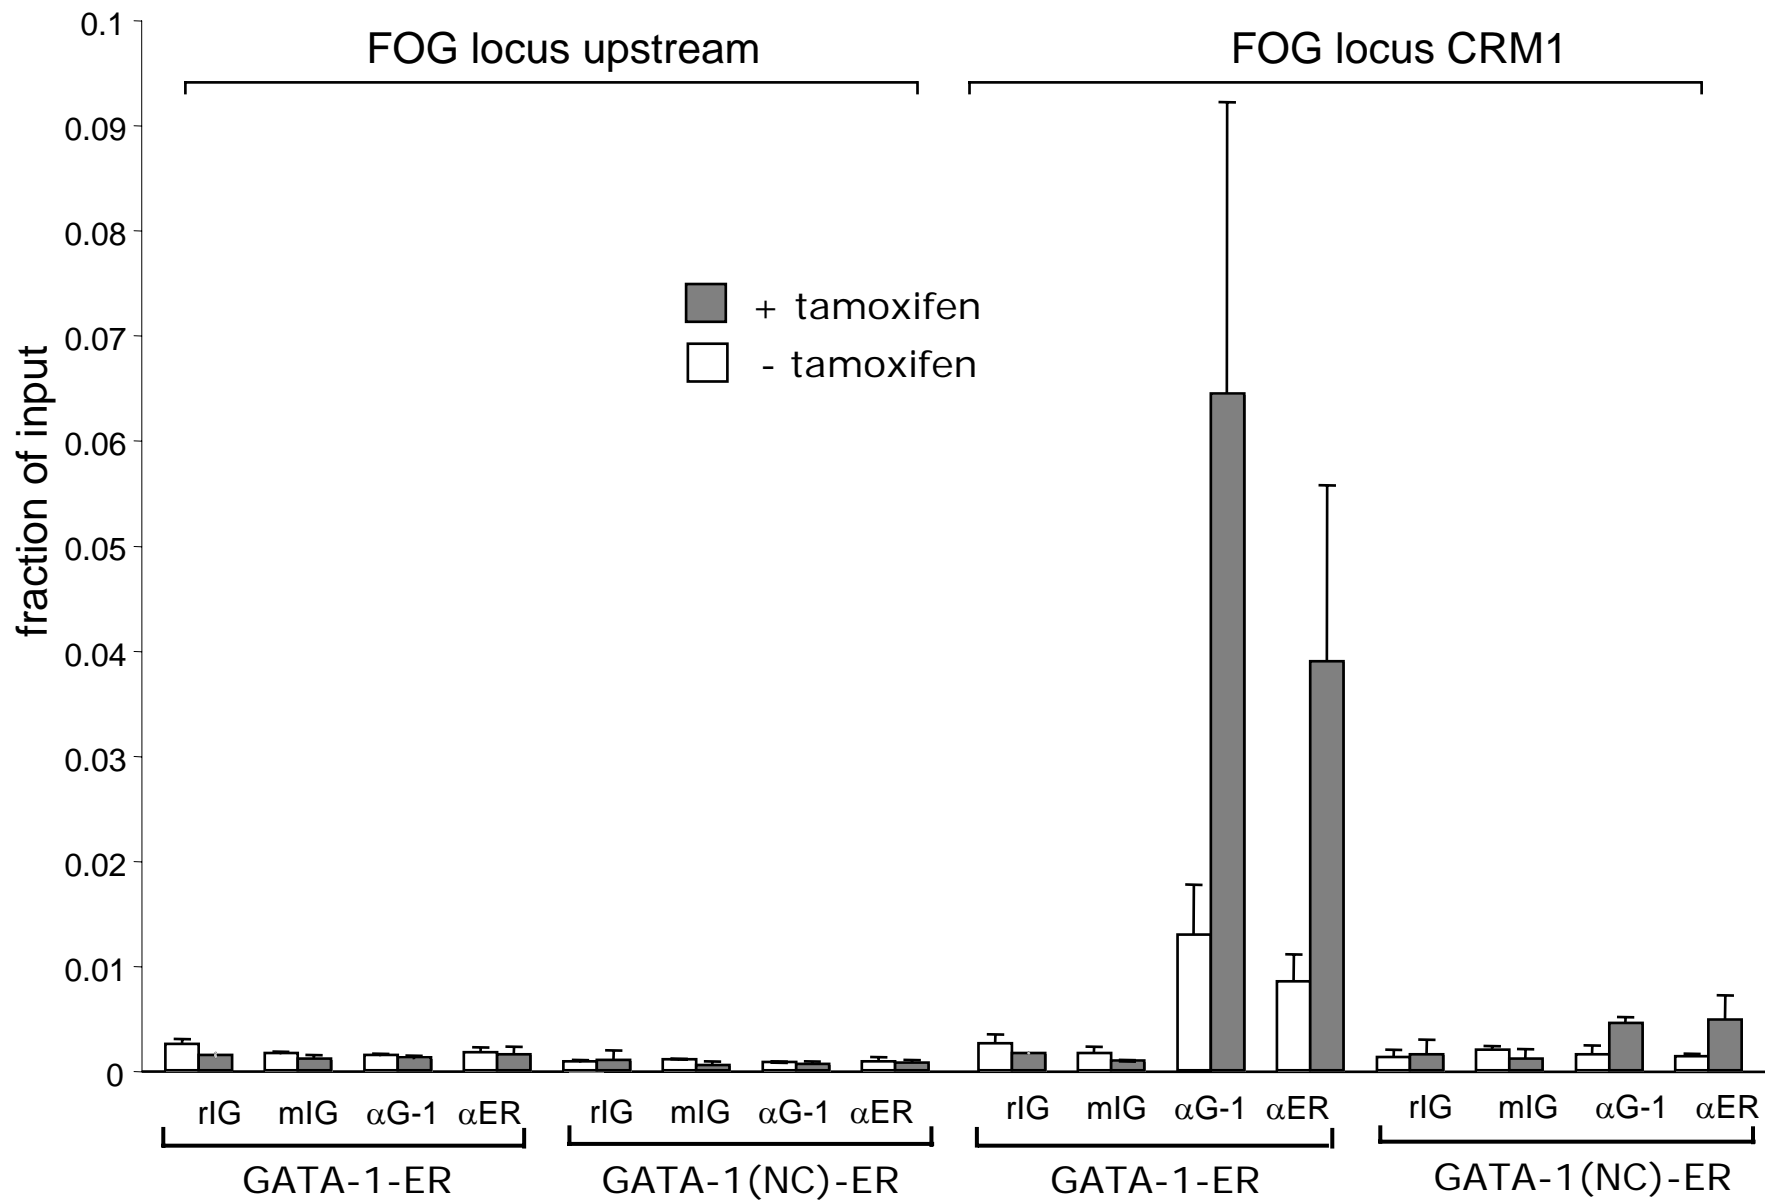

D

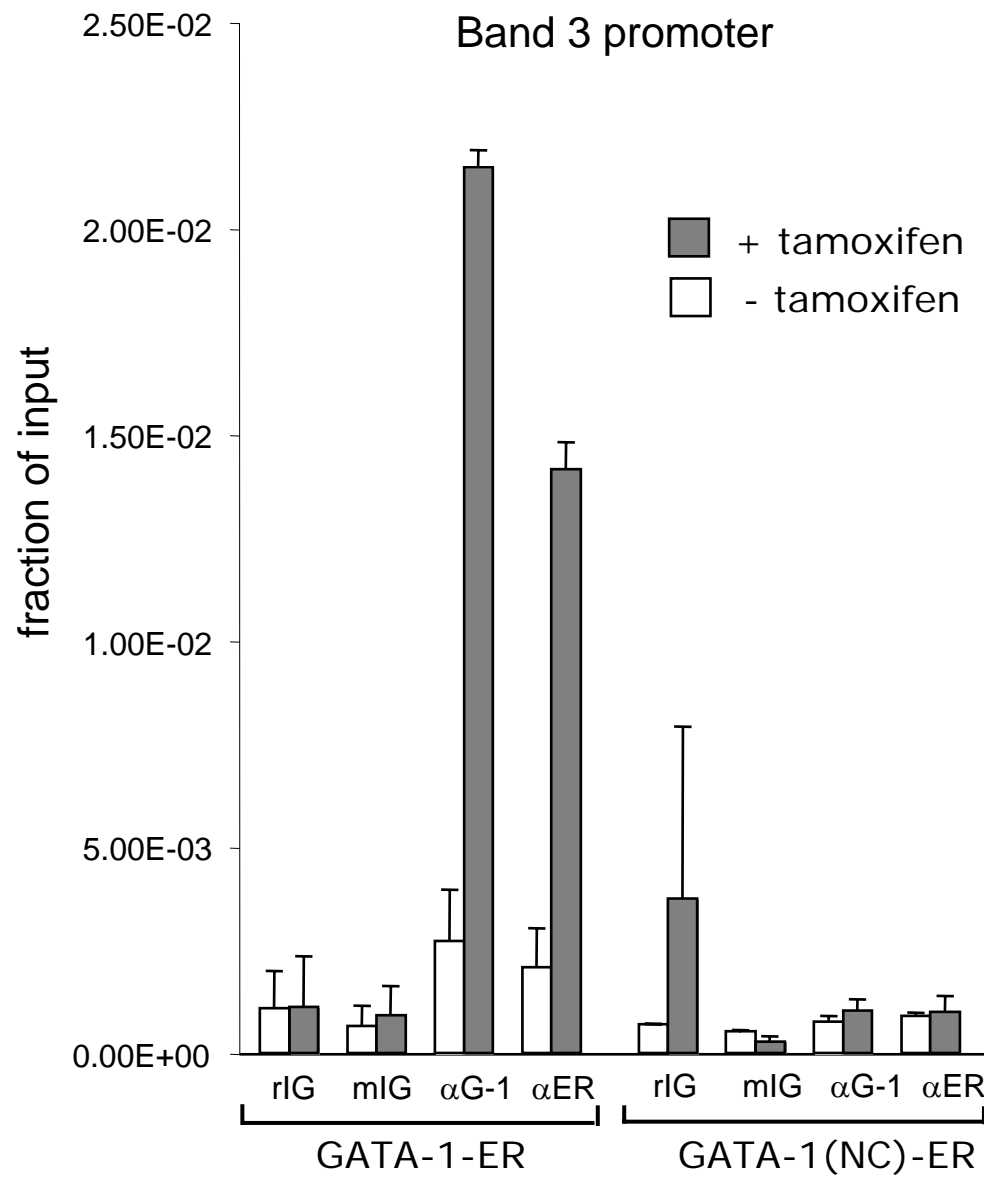

E

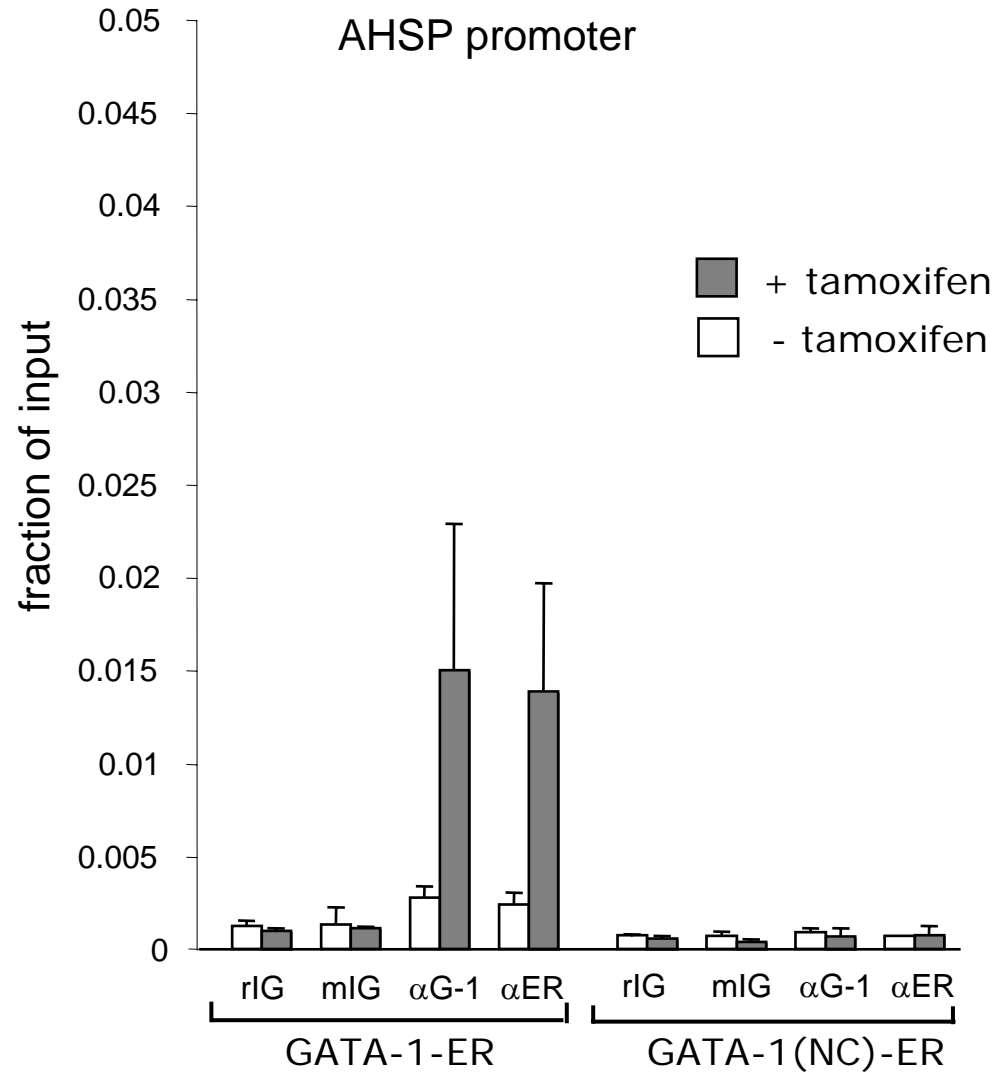

F

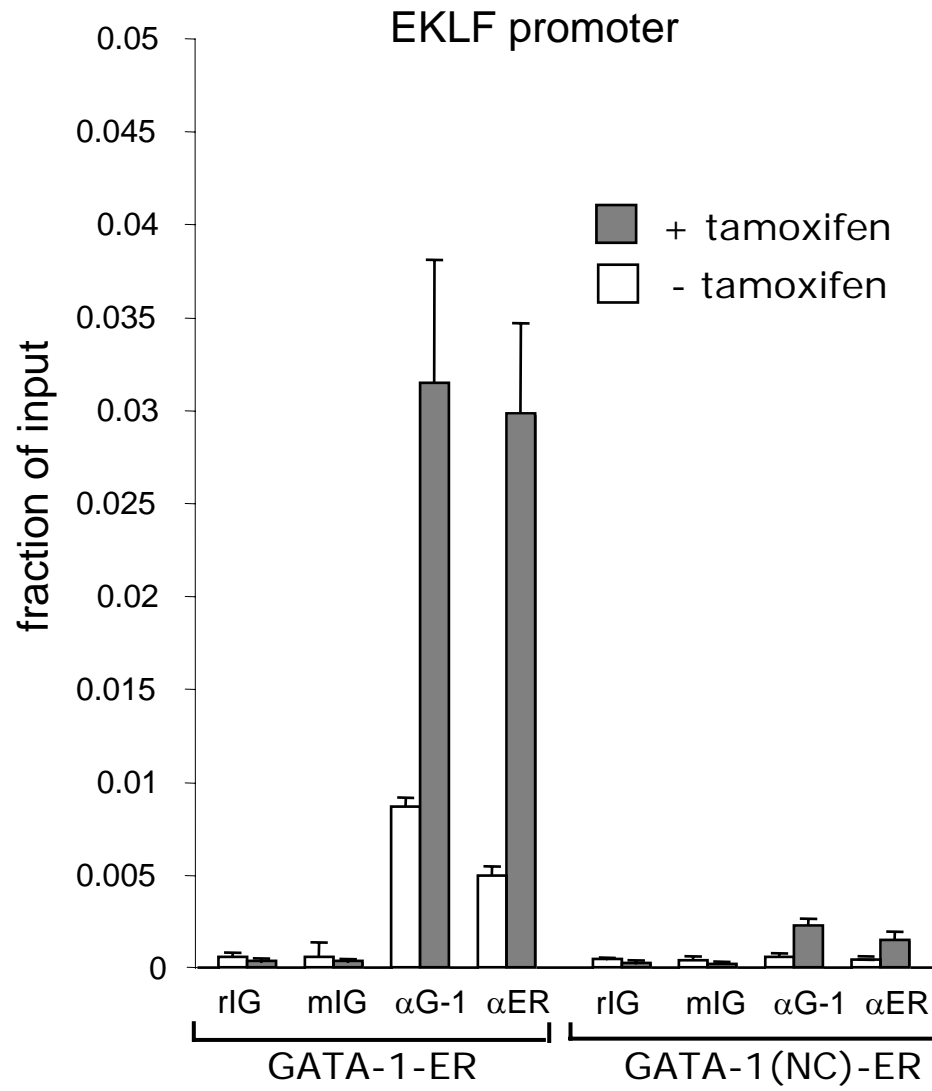

G

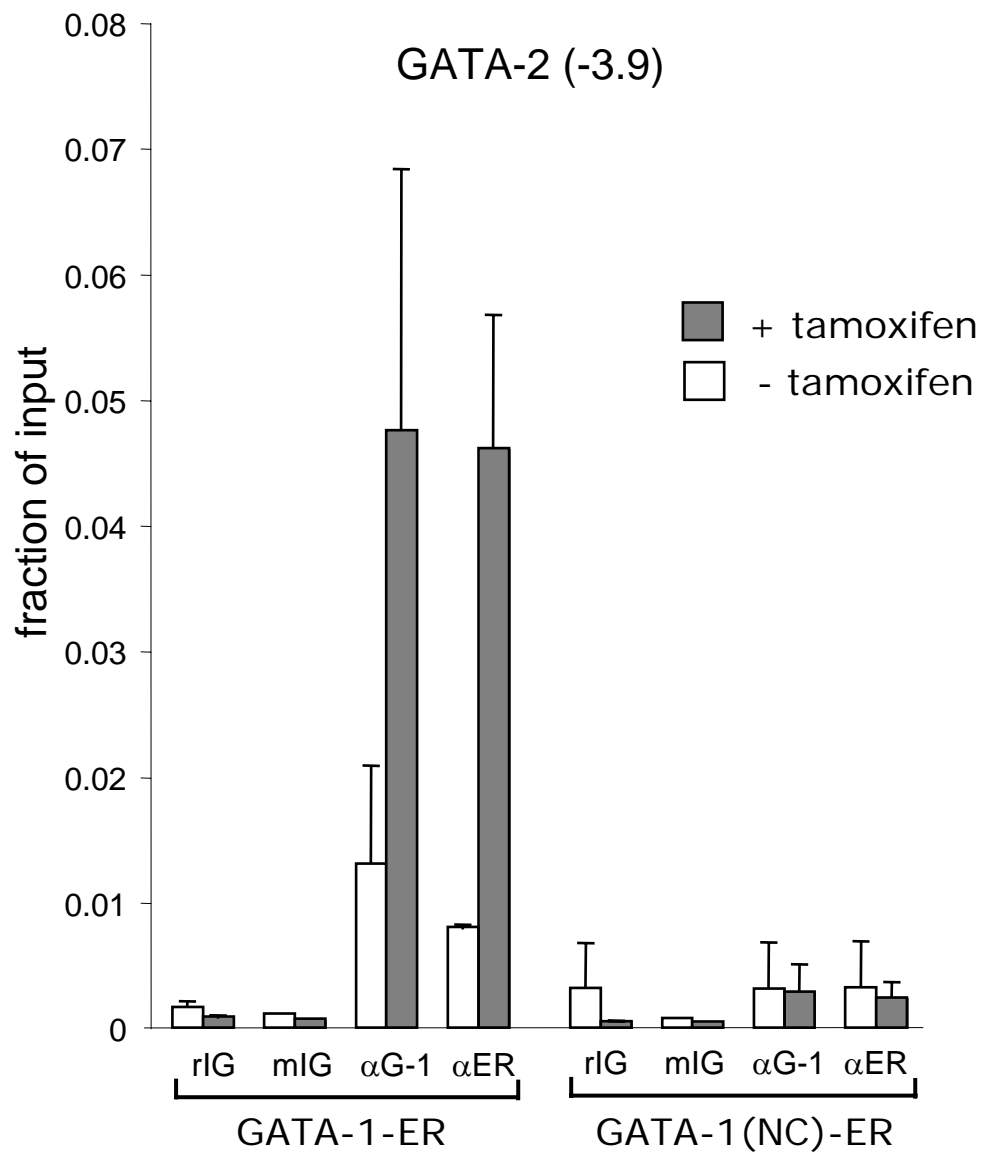

H

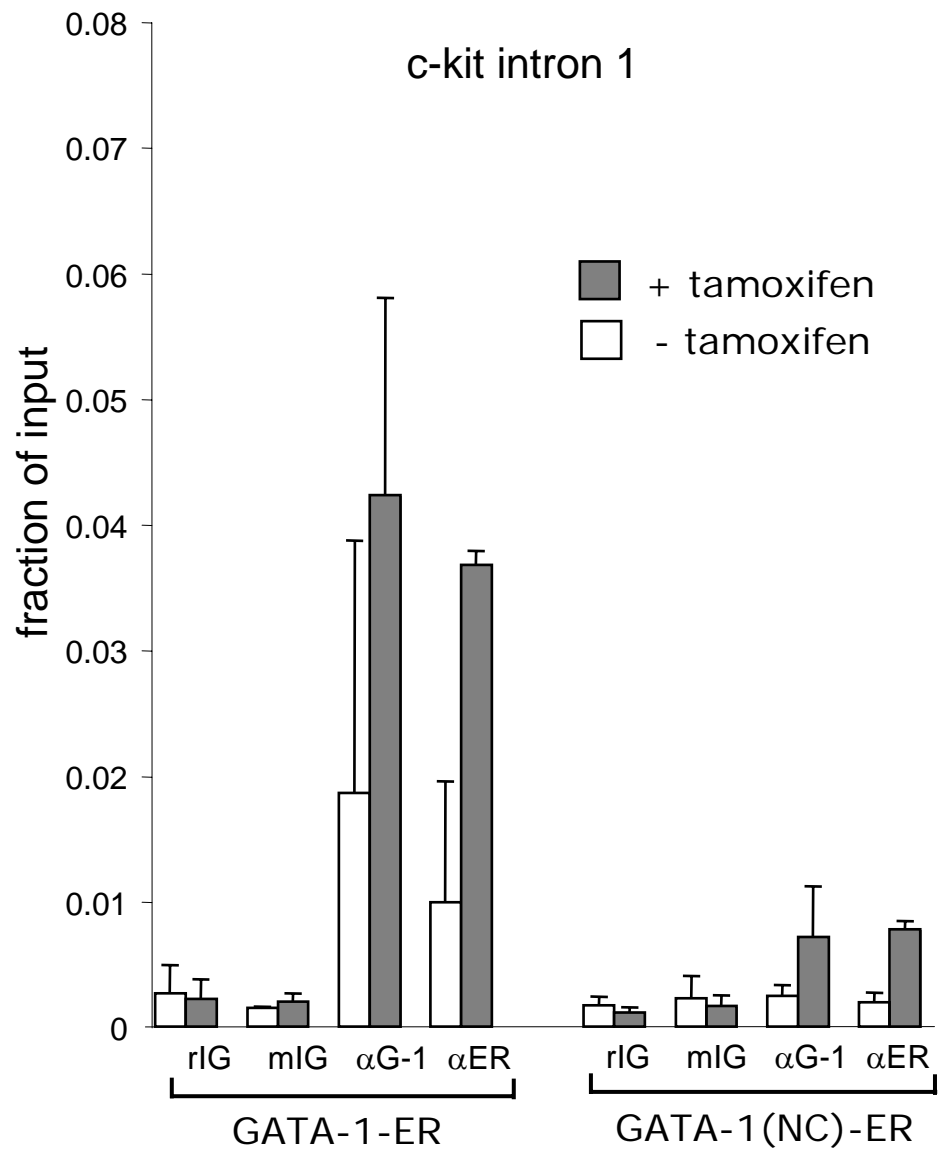

Supplement: blood_blood-2006-07-032847_5.pdf [file blood_blood-2006-07-032847_5.pdf]
